# Supplementary material
Source: PubMed Central journal article supplement (PMC4117364)
Supplement: supp_WNL.0000000000000597_Supplemental_data.pdf [file supp_WNL.0000000000000597_Supplemental_data.pdf]

Figure e-1. Relationship between age and total score on the Mini Mental State Exam (MMSE)

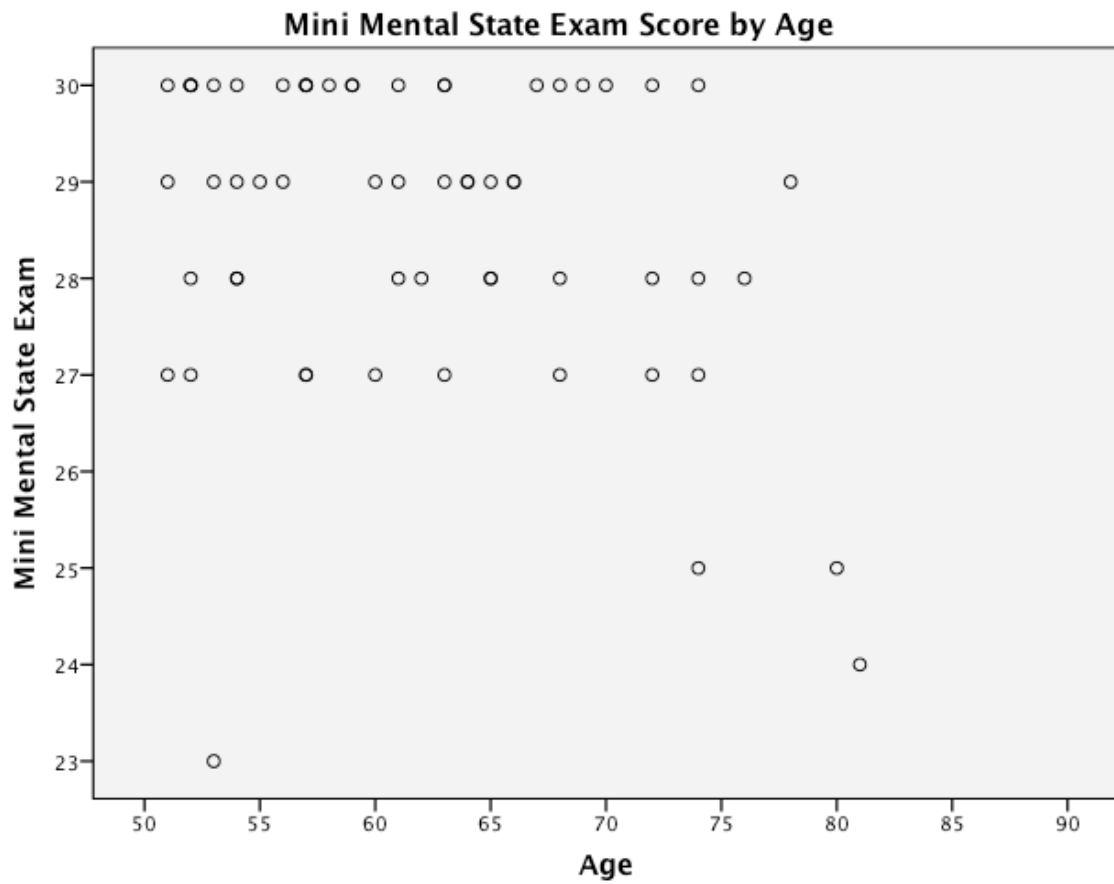

Scatter plot displaying the relationship between age and total score on the Mini Mental State Exam

Figure e-2. Histograms of (a) Anterior Thalamic Radiation and (b) Cingulum of the Hippocampus, and scatter plots of (c) Anterior Thalamic Radiation, (d) Cingulum of the Hippocampus, (e) Inferior Fronto-Occipital Fasciculus and (f) Cingulum of the Cingulate Cortex.

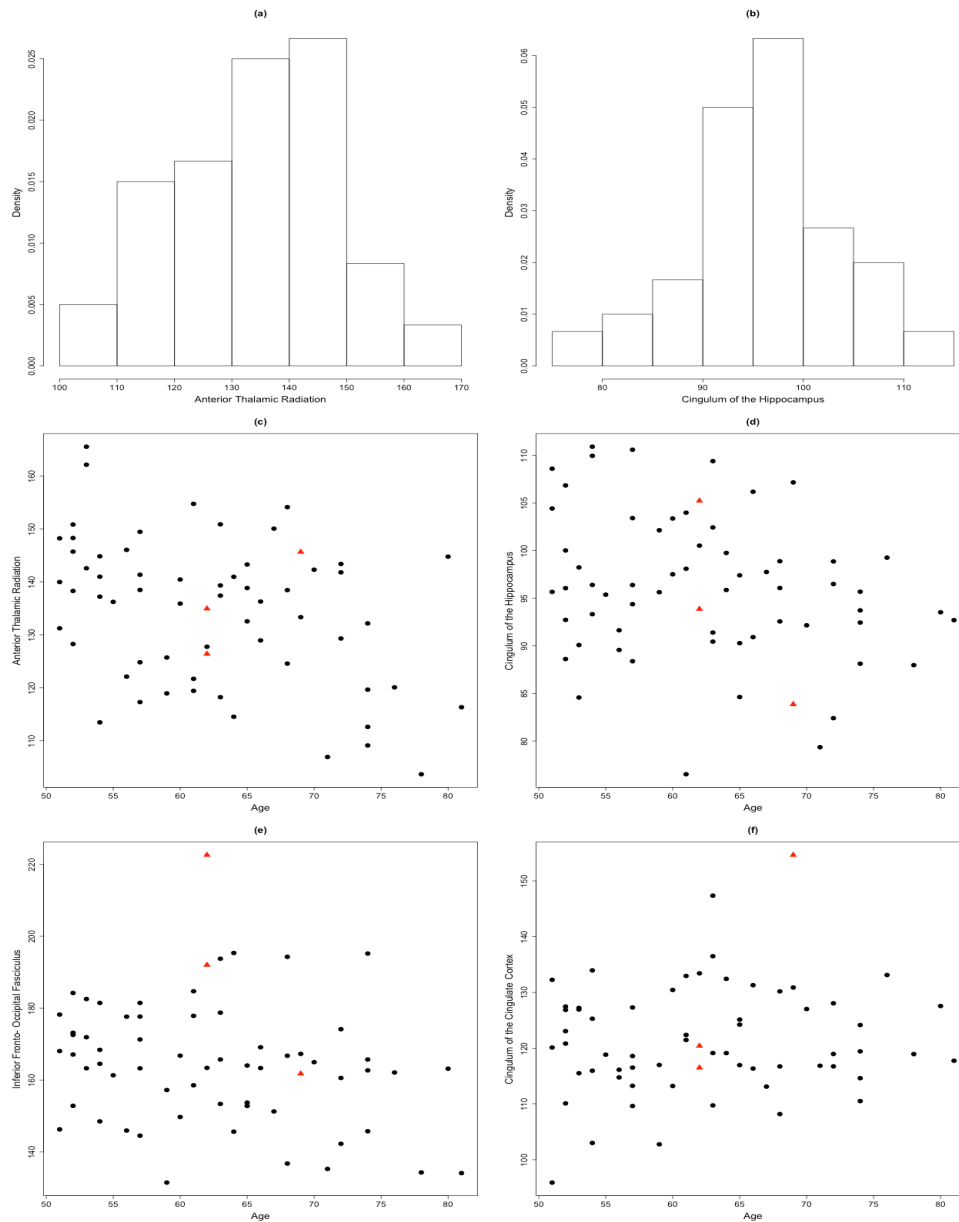

Solid circle dots are the subjects analyzed, the red triangles are the three subjects excluded. For (e) Inferior Fronto-Occipital Fasciculus, one outlier had a FBL value of 222.6 ( $> 3$  SD from the mean) with age 62, where the analyzed 60 subjects had an average of 163.8 with standard deviation 15.81. For (f) Cingulum of the Cingulate Cortex, one outlier had a FBL value of 154.6 ( $> 3$  SD away from the mean) with age 69, where the analyzed 60 subjects had an average of 121.1 with standard deviation 9.21. A third subject was excluded due to our MMSE inclusion criterion.

Figure e-3. Relationship between whole brain mean fiber bundle length and whole brain mean fractional anisotropy

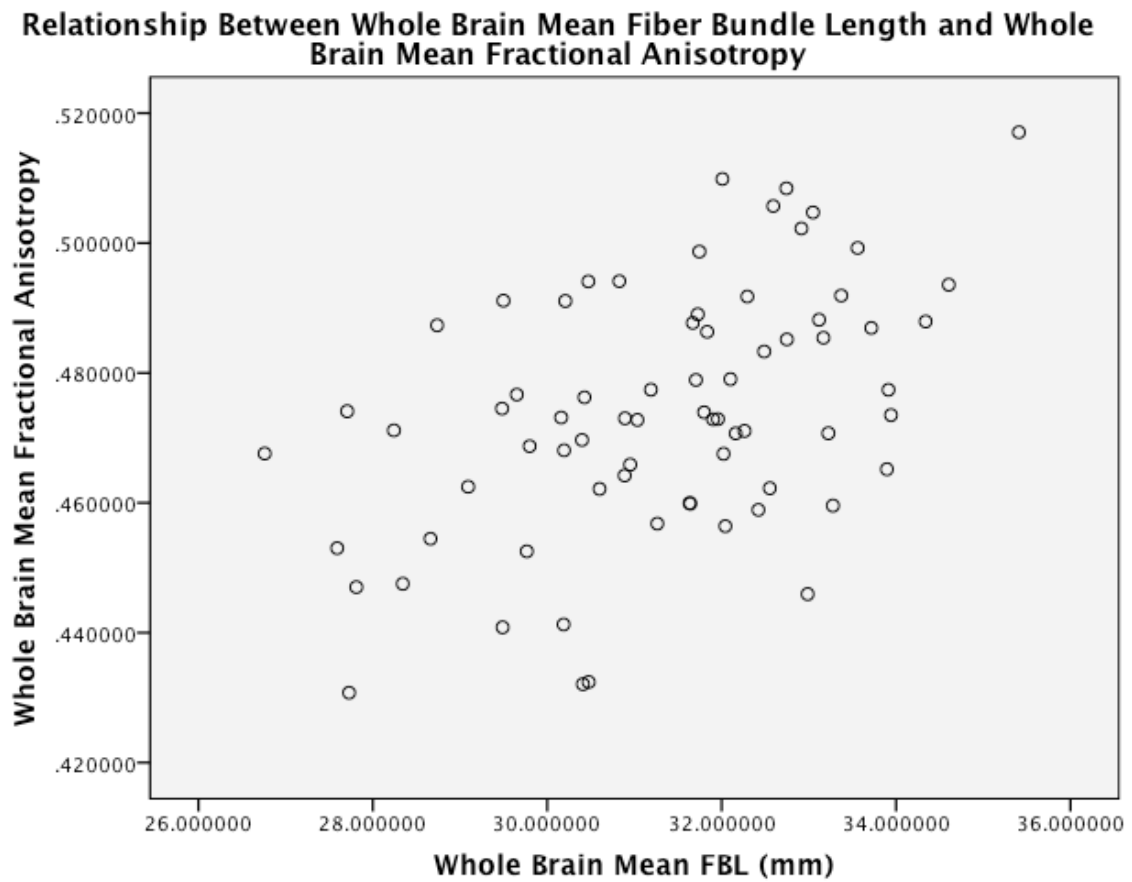

Scatter plot displaying the relationship between whole brain mean fiber bundle length and whole brain mean fractional anisotropy

Figure e-4. Relationship between whole brain mean fiber bundle length and whole brain white matter volume

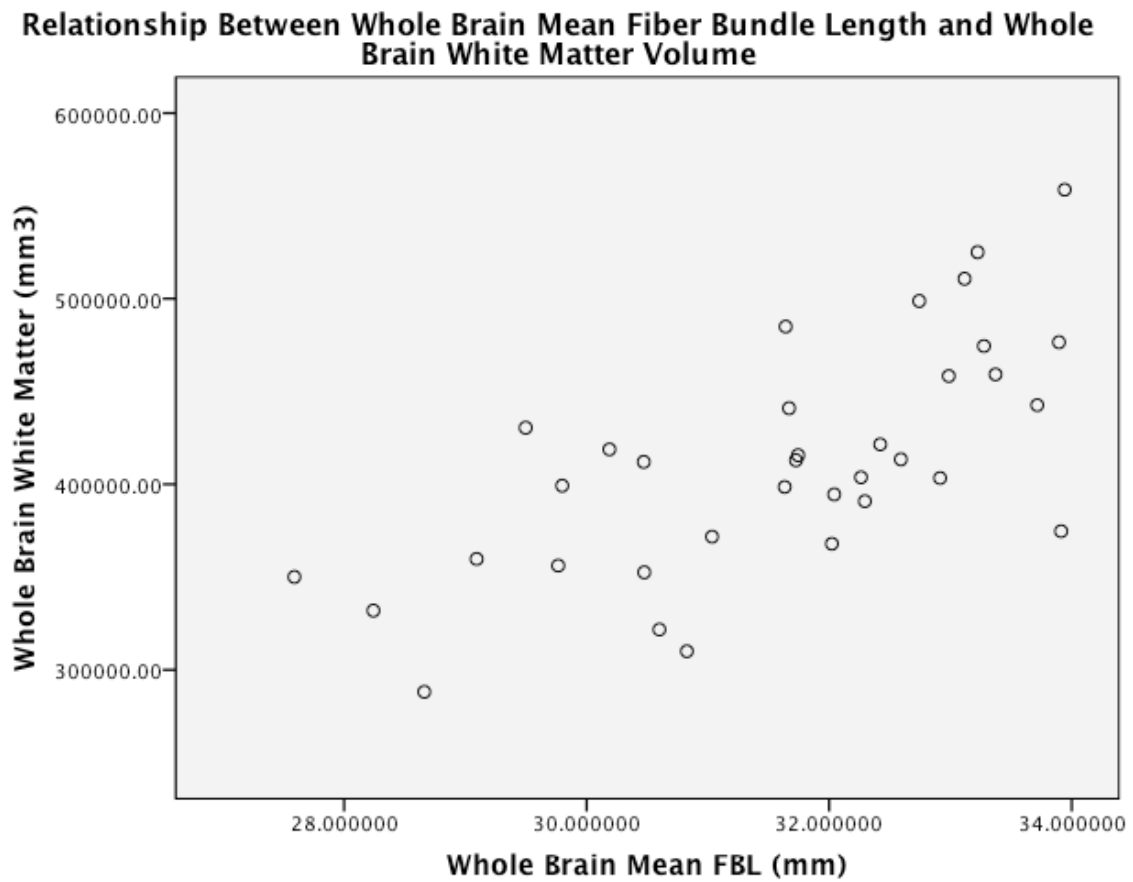

Scatter plot displaying the relationship between whole brain mean fiber bundle length and whole brain mean white matter volume

Figure e-5. Visualization of the JHU atlas region-of-interest for the anterior thalamic radiation. A smoothed boundary surface representation is shown.

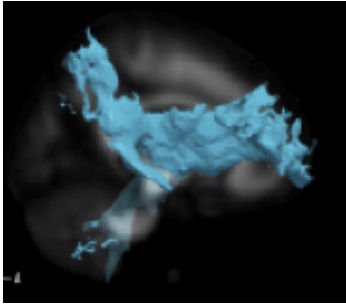

Left side view

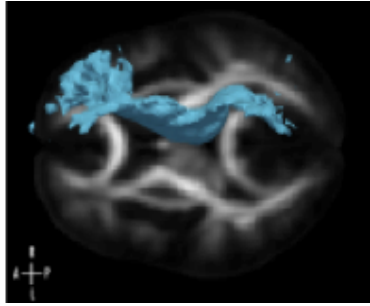

Top side view

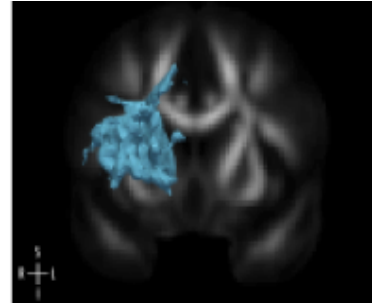

Front side view

Figure e-6. Population variability of the right anterior thalamic radiation in six randomly selected subjects

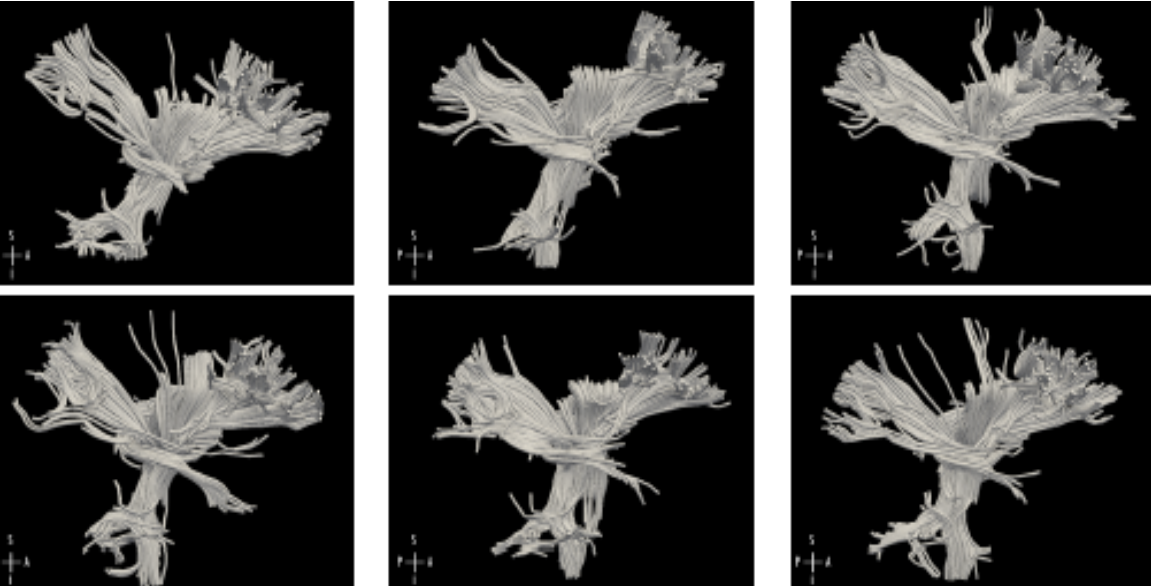

Figure e-7. Example of the right hemisphere anterior thalamic radiation extracted in a single subject. Each voxel is colored by the number of curves passing through it.

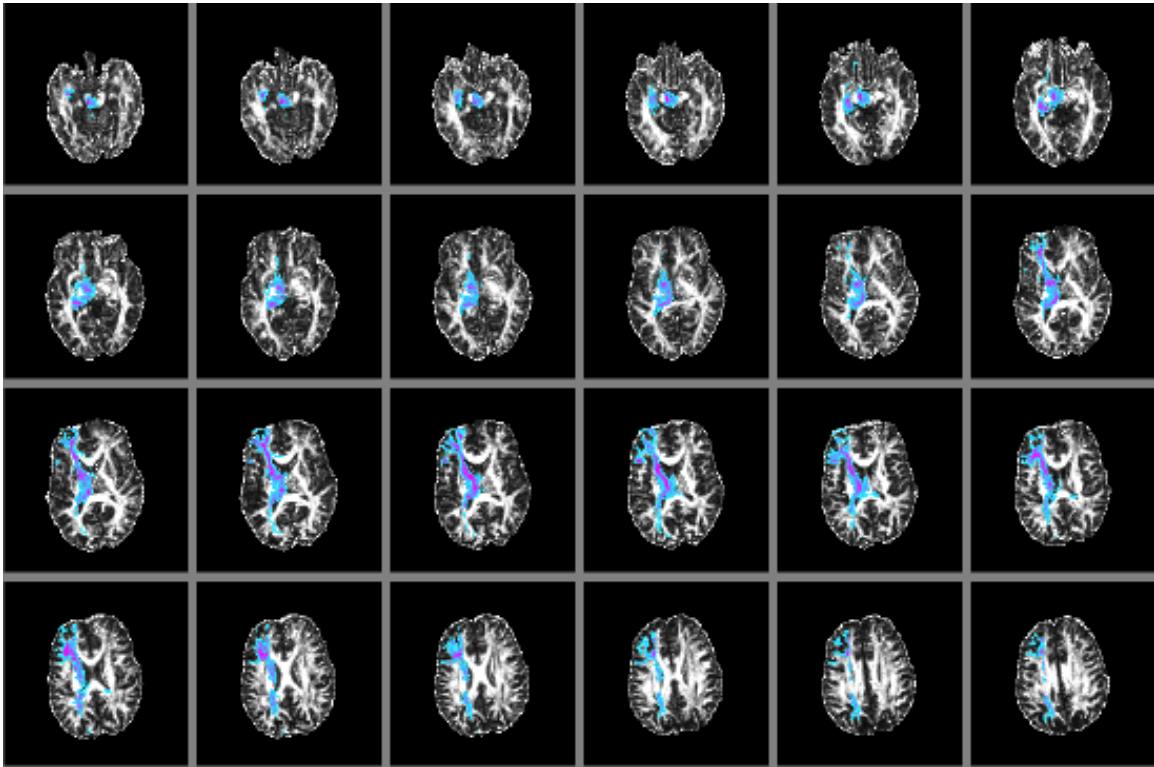

Figure e-8. Visualization of the JHU atlas region-of-interest for the anterior thalamic radiation. A smoothed boundary surface representation is shown.

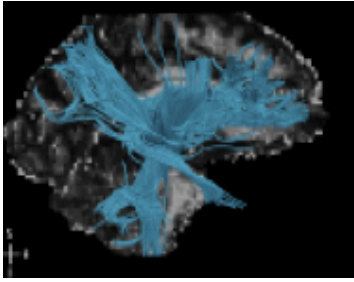

Left side view

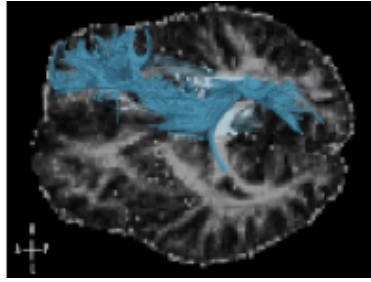

Top side view

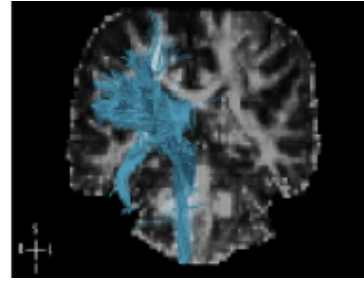

Front side view



Table e-1. Univariate analyses of age and fiber bundle length (mm) on all 63 subjects

|                                       | Coefficient | SE    | T      | <i>p</i> value |
|---------------------------------------|-------------|-------|--------|----------------|
| <b>Age</b>                            |             |       |        |                |
| Uncinate Fasciculus                   | -0.057      | 0.158 | -0.364 | 0.717          |
| Inferior Fronto- Occipital Fasciculus | -0.461      | 0.269 | -1.716 | 0.091          |
| Inferior Longitudinal Fasciculus      | -0.102      | 0.141 | -0.719 | 0.475          |
| Superior Longitudinal Fasciculus      | 0.087       | 0.097 | 0.889  | 0.378          |
| Anterior Thalamic Radiation           | -0.627      | 0.198 | -3.161 | 0.002*         |
| Cingulum of the Cingulate Cortex      | 0.161       | 0.156 | 1.035  | 0.304          |
| Cingulum of the Hippocampus           | -0.250      | 0.116 | -2.160 | 0.035*         |
| Corticospinal Tract                   | -0.096      | 0.252 | -0.382 | 0.703          |

We applied the same statistical analysis in the manuscript to all 63 subjects, including the three subjects excluded. The regression results are similar to the results in the main text, and Anterior Thalamic Radiation is significant ( $p < 0.05$ , Bonferroni corrected) while Cingulum of the Hippocampus is significant before correction.

Table e-2. Univariate analyses of age and fractional anisotropy

|                                      | Coefficient | SE       | T      | <i>p</i> value | Bonferroni p-value | FDR <i>p</i> value |
|--------------------------------------|-------------|----------|--------|----------------|--------------------|--------------------|
| <b>Age</b>                           |             |          |        |                |                    |                    |
| Uncinate Fasciculus                  |             |          |        |                |                    |                    |
| Right                                | -9.80E-02   | 4.51E-02 | -2.172 | 0.034*         | 0.544              | 0.091              |
| Left                                 | -8.36E-03   | 3.59E-02 | -0.233 | 0.816          | 1.000              | 0.930              |
| Inferior Fronto-Occipital Fasciculus |             |          |        |                |                    |                    |
| Right                                | -2.07E-01   | 7.34E-02 | -2.818 | 0.007*         | 0.112              | 0.091              |
| Left                                 | 1.72E-01    | 7.65E-02 | -2.246 | 0.029*         | 0.464              | 0.091              |
| Inferior Longitudinal Fasciculus     |             |          |        |                |                    |                    |
| Right                                | -7.96E-02   | 4.68E-02 | -1.699 | 0.095          | 1.000              | 0.217              |
| Left                                 | -9.84E-02   | 4.51E-02 | -2.182 | 0.033*         | 0.528              | 0.091              |
| Superior Longitudinal Fasciculus     |             |          |        |                |                    |                    |
| Right                                | -1.54E-02   | 2.61E-02 | -0.591 | 0.557          | 1.000              | 0.742              |
| Left                                 | 3.19E-03    | 3.06E-02 | 0.104  | 0.918          | 1.000              | 0.930              |
| Anterior Thalamic Radiation          |             |          |        |                |                    |                    |
| Right                                | -1.46E-01   | 5.74E-02 | -2.540 | 0.014*         | 0.224              | 0.091              |
| Left                                 | -1.33E-01   | 5.69E-02 | -2.348 | 0.022*         | 0.352              | 0.091              |
| Cingulum of the Cingulate Cortex     |             |          |        |                |                    |                    |
| Right                                | -7.80E-03   | 4.98E-02 | -0.157 | 0.876          | 1.000              | 0.930              |
| Left                                 | -5.50E-03   | 6.21E-02 | -0.089 | 0.930          | 1.000              | 0.930              |
| Cingulum of the Hippocampus          |             |          |        |                |                    |                    |
| Right                                | -5.17E-02   | 4.12E-02 | -1.256 | 0.214          | 1.000              | 0.388              |
| Left                                 | -4.04E-04   | 3.25E-04 | -1.245 | 0.218          | 1.000              | 0.388              |
| Corticospinal Tract                  |             |          |        |                |                    |                    |
| Right                                | -7.02E-02   | 7.88E-02 | -0.891 | 0.377          | 1.000              | 0.603              |
| Left                                 | 6.51E-02    | 8.12E-02 | 0.802  | 0.426          | 1.000              | 0.620              |
